# Supplementary material for: Evaluating the Effects of Omega-3 Polyunsaturated Fatty Acids on Inflammatory Bowel Disease via Circulating Metabolites: A Mediation Mendelian Randomization Study
Source: MDPI journal article supplement (doi:10.3390/metabo13101041), 2023-09-28
Supplement: s1 [file s1]

## Online Supplementary Materials

Figure S1. Selection process for the data included in the study.

Figure S2. Leave one out plots of the causal effects of omega-3 polyunsaturated fatty acids on inflammatory bowel disease, Crohn's disease, and ulcerative colitis showing inverse variance weighted estimates after omitting each SNP.

Table S1. Data sources of genome-wide association studies included in the Mendelian randomization analysis.

Table S2. Statistics used to assess instrument strength.

Table S3. Sensitivity analyses used to assess causal effects of omega-3 polyunsaturated fatty acids on the risk of Crohn's disease, and ulcerative colitis.

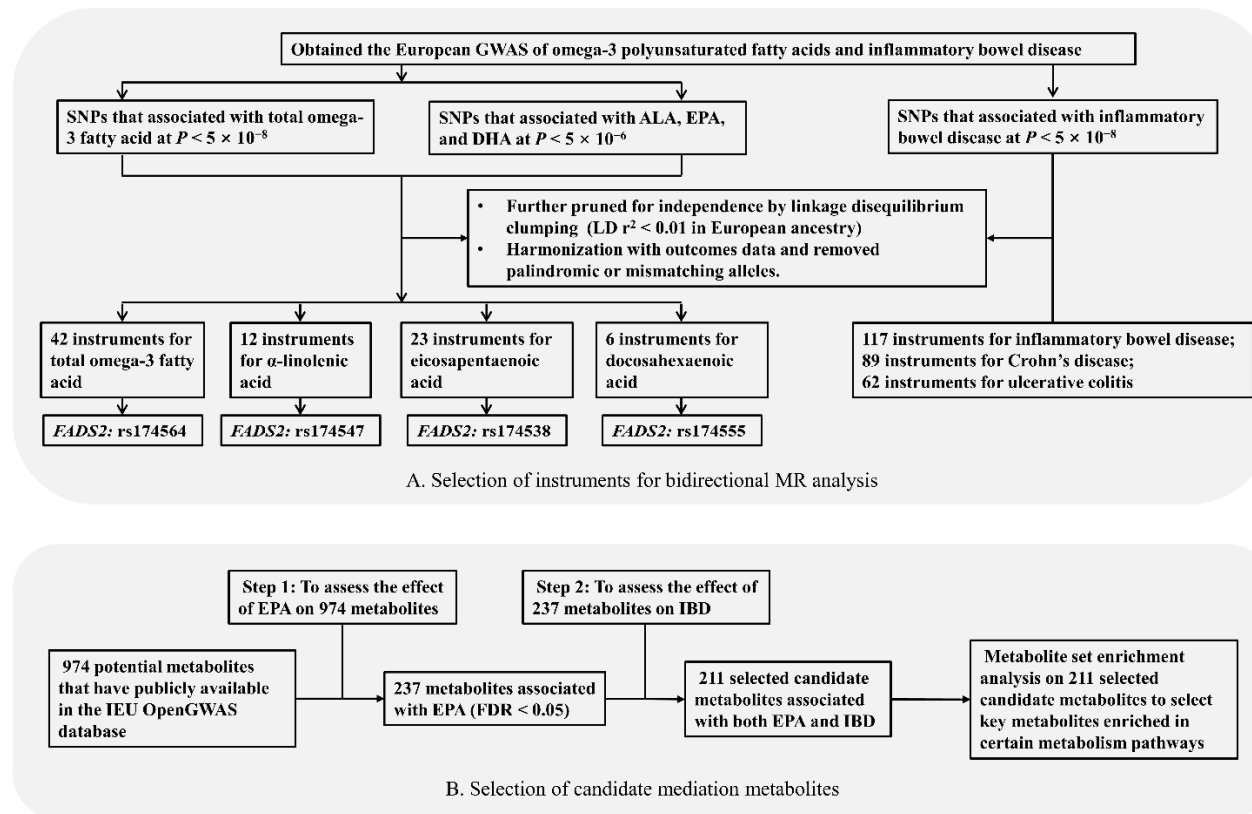

Supplementary Figure 1

**Figure S1. Selection process for the data included in the study.** ALA,  $\alpha$ -linolenic acid; DHA, docosahexaenoic acid; EPA, eicosapentaenoic acid; *FADS2*, fatty acid

*desaturase 2*; GWAS, genome-wide association study; MR, Mendelian randomization; SNPs, Single-nucleotide polymorphisms.

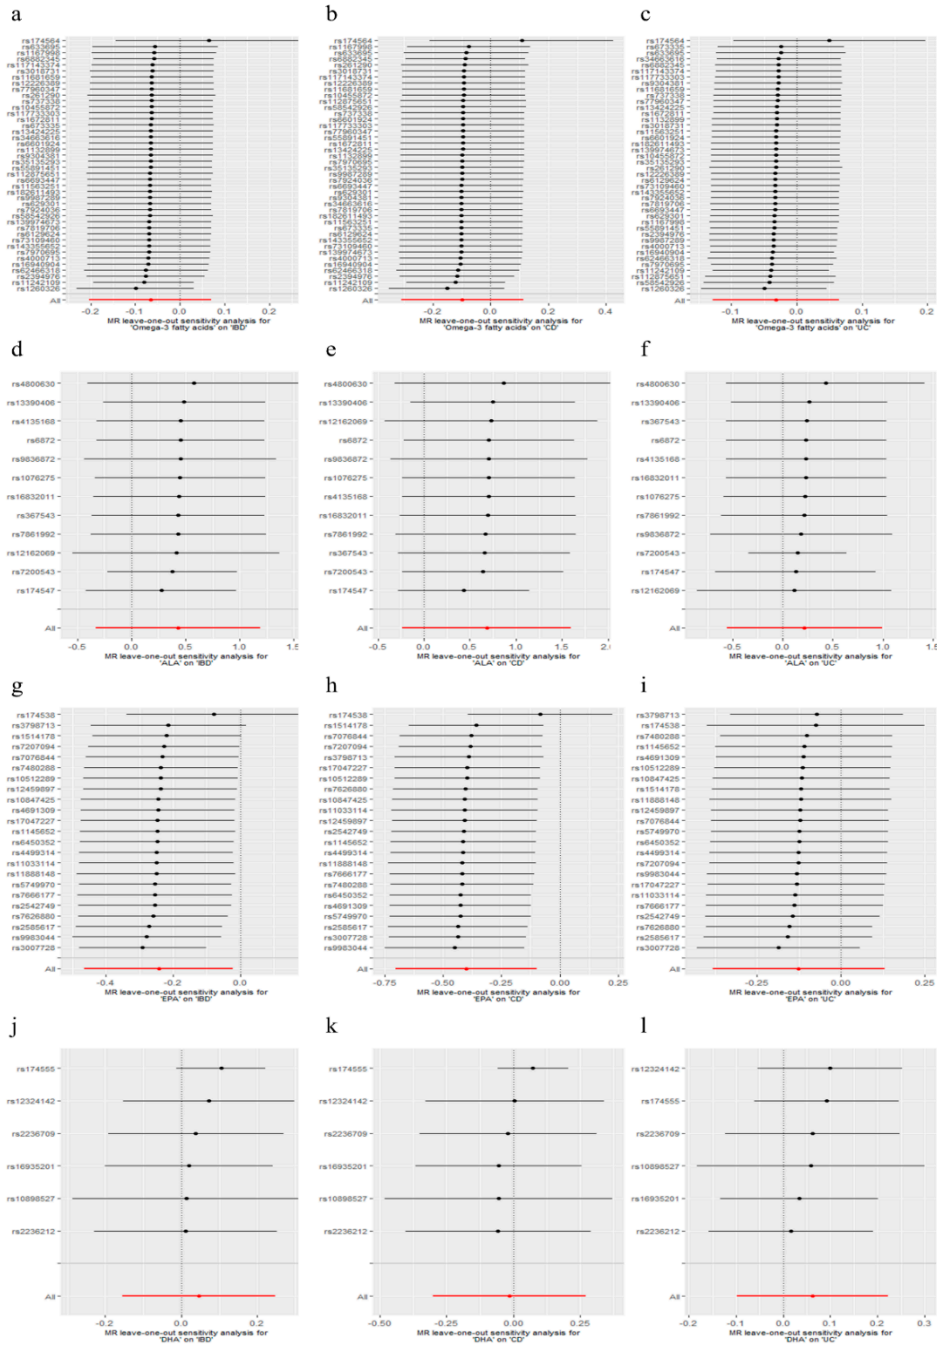

Supplementary Figure S2

**Figure S2. Leave one out plots of the causal effects of omega-3 polyunsaturated fatty acids on inflammatory bowel disease, Crohn's disease, and ulcerative colitis showing inverse variance weighted estimates after omitting each SNP.** Each black point represents the IVW MR method applied to estimate the causal effect of omega-3 PUFAs on IBD excluding that particular variant from the analysis. The red point depicts the IVW estimate using all SNPs.

**Table S1. Data sources of genome-wide association studies included in the Mendelian randomization analysis.**

| <b>Instrument</b>               | <b>Phenotype</b>           | <b>Reference</b>     | <b>Consortium</b>                                            | <b>Sample size</b>              | <b>Ancestry</b> |
|---------------------------------|----------------------------|----------------------|--------------------------------------------------------------|---------------------------------|-----------------|
| Instrument-exposure information | Total omega-3 fatty acid   | Borges MC et al [17] | UK Biobank                                                   | up to 114,999                   | European        |
|                                 | $\alpha$ -linolenic acid   | Lemaitre et al [18]  | CHARGE Consortium                                            | up to 8866                      | European        |
|                                 | Eicosapentaenoic acid      |                      |                                                              |                                 |                 |
|                                 | Docosahexaenoic acid       |                      |                                                              |                                 |                 |
| Instrument-outcome information  | Inflammatory bowel disease | de Lange et al [19]  | International Inflammatory Bowel Disease Genetics Consortium | Cases=25,042<br>controls=34,915 | European        |
|                                 | Crohn's disease            |                      |                                                              | Cases=12,194<br>controls=28,072 | European        |
|                                 | Ulcerative colitis         |                      |                                                              | Cases=12,366<br>controls=33,609 | European        |

---

---

**Table S2. Statistics used to assess instrument strength.**

| <b>Exposure</b>          | <b>Outcome</b> | <b>No. of SNPs</b> | <b><i>F</i></b> | <b><i>F (F – 1) / F</i></b> | <b><i>I<sup>2</sup>GX</i></b> |
|--------------------------|----------------|--------------------|-----------------|-----------------------------|-------------------------------|
| Total omega-3 fatty acid | IBD/CD/UC      | 42                 | 262.21          | 0.996                       | 0.99                          |
| ALA                      |                | 12                 | 47.74           | 0.950                       | 0.94                          |
| EPA                      |                | 23                 | 34.56           | 0.972                       | 0.84                          |
| DHA                      |                | 6                  | 29.82           | 0.956                       | 0.82                          |

Abbreviations: ALA,  $\alpha$ -linolenic acid; CD, Crohn's disease; DHA, docosahexaenoic acid; EPA, eicosapentaenoic acid; IBD, inflammatory bowel disease; UC, ulcerative colitis.

**Table S3. Sensitivity analyses used to assess causal effects of omega-3 polyunsaturated fatty acids on the risk of Crohn's disease, and ulcerative colitis.**

| Exposure                 | Outcome | MR-Egger          |          | Weighted median   |          | Heterogeneity |                      | Pleiotropy                     |                             |
|--------------------------|---------|-------------------|----------|-------------------|----------|---------------|----------------------|--------------------------------|-----------------------------|
|                          |         | OR (95% CI)       | <i>p</i> | OR (95% CI)       | <i>p</i> | Q             | <i>P<sub>h</sub></i> | MR Egger<br>int <i>p</i> value | MR-PRESSO<br><i>p</i> value |
| Total omega-3 fatty acid | CD      | 0.74 (0.56, 0.98) | 0.04     | 0.79 (0.72, 0.86) | <0.001   | 331.1         | <0.001               | 0.04                           | <0.001                      |
| ALA                      |         | 1.70 (0.59, 4.92) | 0.35     | 1.72 (0.93, 3.17) | 0.08     | 41.1          | <0.001               | 0.56                           | 0.002                       |
| EPA                      |         | 0.52 (0.25, 1.06) | 0.09     | 0.59 (0.39, 0.88) | 0.01     | 33.9          | 0.05                 | 0.45                           | 0.03                        |
| DHA                      |         | 1.29 (0.68, 2.47) | 0.48     | 1.05 (0.89, 1.24) | 0.56     | 26.1          | <0.001               | 0.41                           | 0.005                       |
| Total omega-3 fatty acid | UC      | 0.91 (0.80, 1.04) | 0.17     | 0.93 (0.85, 1.02) | 0.12     | 71.4          | 0.002                | 0.19                           | <0.001                      |
| ALA                      |         | 1.15 (0.46, 2.86) | 0.77     | 1.35 (0.73, 2.49) | 0.33     | 30.2          | 0.002                | 0.73                           | 0.014                       |
| EPA                      |         | 1.05 (0.56, 1.94) | 0.89     | 0.81 (0.56, 1.17) | 0.22     | 24.9          | 0.30                 | 0.56                           | 0.35                        |
| DHA                      |         | 1.08 (0.73, 1.60) | 0.73     | 1.08 (0.91, 1.28) | 0.39     | 8.5           | 0.13                 | 0.94                           | 0.23                        |

Abbreviations: ALA,  $\alpha$ -linolenic acid; CI, confidence interval; CD, Crohn's disease; DHA, docosahexaenoic acid; EPA, eicosapentaenoic acid; Egger int, egger intercept; MR,

Mendelian randomization; OR, odds ratio; *P<sub>h</sub>*, *P*-value for heterogeneity; UC, ulcerative colitis.
